# Supplementary material for: Decreased IRS Signaling Impairs β-Cell Cycle Progression and Survival in Transgenic Mice Overexpressing S6K in β-Cells
Source: PubMed Central journal article supplement — Diabetes. 2010 Jul 9;59(10):2390–9. doi: 10.2337/db09-0851 (PMC3279560; doi:10.2337/db09-0851), 2010-07-09
Supplement: supp_db09-0851_db090851onlineappendix.pdf [file supp_db09-0851_db090851onlineappendix.pdf]

**Supplemental Figure 1: In vitro assessment of cell size in wild-type and S6KCA<sup>RIP</sup> animals**  
 Immunofluorescence staining for insulin (green) and HA tag (red) in dispersed cells from WT and S6KCA<sup>RIP</sup> islets. DAPI was used to counter stain the nuclei.

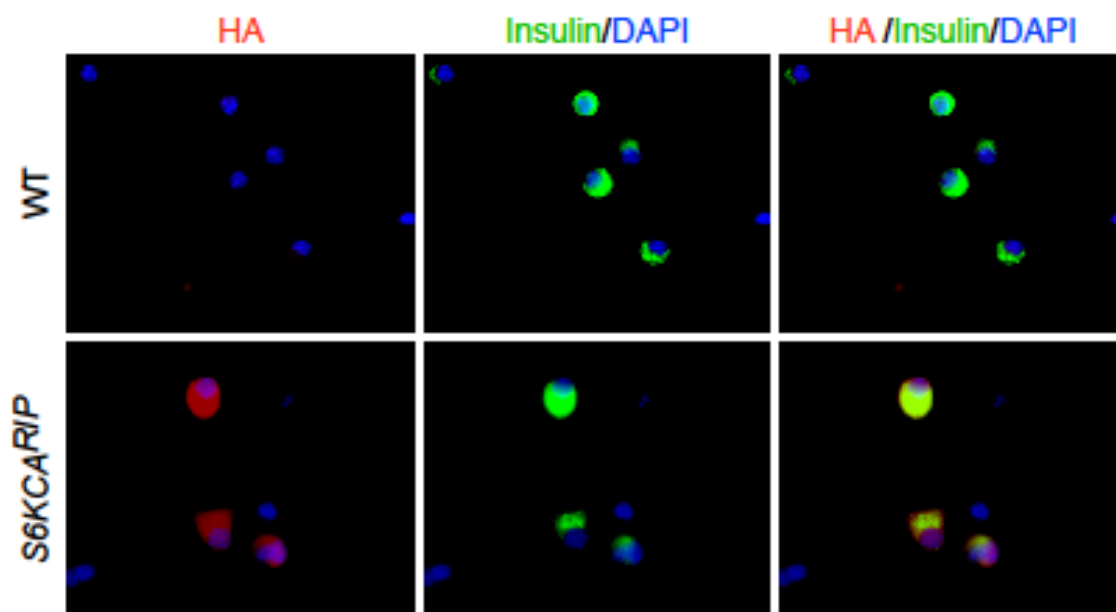

**Supplemental Table 1: Antibodies Used for Immunoblotting.**

| <i>Specie</i> | <i>Antibodies used</i>                | <i>Source</i>        |
|---------------|---------------------------------------|----------------------|
| rabbit        | Actin                                 | Sigma                |
| rabbit        | Cdk2                                  | Santa Cruz           |
| mouse         | Cdk4                                  | Cell Signaling       |
| mouse         | CyclinD1                              | Cell Signaling       |
| mouse         | CyclinD2                              | Neomarkers Labvision |
| mouse         | CyclinD3                              | Cell Signaling       |
| rabbit        | CyclinE                               | Santa Cruz           |
| mouse         | HA.11                                 | Covance              |
| rabbit        | IRS1                                  | Millipore            |
| rabbit        | IRS2                                  | Millipore            |
| mouse         | p16                                   | Santa Cruz           |
| mouse         | p21                                   | BD Biosciences       |
| rabbit        | p27 <sup>Kip1</sup>                   | Cell Signaling       |
| rabbit        | phospho 4EBP1 (Ser65)                 | Cell Signaling       |
| rabbit        | phospho-Akt (Ser473 and Thr308)       | Cell Signaling       |
| rabbit        | phospho-FoxO1 (Ser319)                | Cell Signaling       |
| rabbit        | phospho-GSK3 $\alpha/\beta$ (Ser21/9) | Cell Signaling       |
| rabbit        | phospho-IRS1 (Ser307)                 | Millipore            |
| rabbit        | phospho-S6 kinase                     | Cell Signaling       |
| rabbit        | TSC2                                  | Cell Signaling       |
| mouse         | Tubulin                               | Sigma                |
